# Blockade of T Cell Contact-Activation of Human Monocytes by High-Density Lipoproteins Reveals a New Pattern of Cytokine and Inflammatory Genes

Lyssia Gruaz<sup>1</sup>, Céline Delucinge-Vivier<sup>2</sup>, Patrick Descombes<sup>2</sup>, Jean-Michel Dayer<sup>3</sup>, Danielle Burger<sup>1\*</sup>

<sup>1</sup> Division of Immunology and Allergy, Inflammation and Allergy Research Group, Hans Wilsdorf Laboratory, Department of Internal Medicine and Faculty of Medicine, University of Geneva, Geneva, Switzerland, <sup>2</sup> Genomics Platform, National Center of Competence in Research 'Frontiers in Genetics', University of Geneva, Geneva, Switzerland, <sup>3</sup> Faculty of Medicine, University of Geneva, Geneva, Switzerland

## Abstract

**Background:** Cellular contact with stimulated T cells is a potent inducer of cytokine production in human monocytes and is likely to play a substantial part in chronic/sterile inflammatory diseases. High-density lipoproteins (HDL) specifically inhibit the production of pro-inflammatory cytokines induced by T cell contact.

**Methodology/Principal Findings:** To further elucidate the pro-inflammatory functions of cellular contact with stimulated T cells and its inhibition by HDL, we carried out multiplex and microarray analyses. Multiplex analysis of monocyte supernatant revealed that 12 out of 27 cytokines were induced upon contact with stimulated T cells, which cytokines included IL-1Ra, G-CSF, GM-CSF, IFN $\gamma$ , CCL2, CCL5, TNF, IL-1 $\beta$ , IL-6, IL-8, CCL3, and CCL4, but only the latter six were inhibited by HDL. Microarray analysis showed that 437 out of 54,675 probe sets were enhanced in monocytes activated by contact with stimulated T cells, 164 probe sets (*i.e.*, 38%) being inhibited by HDL. These results were validated by qPCR. Interestingly, the cytokines induced by T cell contact in monocytes comprised IL-1 $\beta$ , IL-6 but not IL-12, suggesting that this mechanism might favor Th17 polarization, which emphasizes the relevance of this mechanism to chronic inflammatory diseases and highlights the contrast with acute inflammatory conditions that usually involve lipopolysaccharides (LPS). In addition, the expression of miR-155 and production of prostaglandin E<sub>2</sub>—both involved in inflammatory response—were triggered by T cell contact and inhibited in the presence of HDL.

**Conclusions/Significance:** These results leave no doubt as to the pro-inflammatory nature of T cell contact-activation of human monocytes and the anti-inflammatory functions of HDL.

**Citation:** Gruaz L, Delucinge-Vivier C, Descombes P, Dayer J-M, Burger D (2010) Blockade of T Cell Contact-Activation of Human Monocytes by High-Density Lipoproteins Reveals a New Pattern of Cytokine and Inflammatory Genes. PLoS ONE 5(2): e9418. doi:10.1371/journal.pone.0009418

**Editor:** Patricia T. Bozza, Fundação Oswaldo Cruz, Brazil

**Received:** October 12, 2009; **Accepted:** February 6, 2010; **Published:** February 25, 2010

**Copyright:** © 2010 Gruaz et al. This is an open-access article distributed under the terms of the Creative Commons Attribution License, which permits unrestricted use, distribution, and reproduction in any medium, provided the original author and source are credited.

**Funding:** This work was supported by grants from the Swiss National Science Foundation (#320000-116259), the Swiss Society for Multiple Sclerosis, and the Hans Wilsdorf Foundation. The funders had no role in study design, data collection and analysis, decision to publish, or preparation of the manuscript.

**Competing Interests:** The authors have declared that no competing interests exist.

\* E-mail: danielle.Burger@hcuge.ch

## Introduction

Imbalance in cytokine homeostasis is thought to play an important part in the pathogenesis of chronic inflammatory diseases such as rheumatoid arthritis and multiple sclerosis. This suggests that the mechanisms underlying the production of pro-inflammatory cytokines and their natural inhibitors fail to undergo natural regulation. In chronic/sterile immuno-inflammatory diseases, in the absence of an infectious agent, the factors triggering pro-inflammatory cytokine production are still elusive. We demonstrated that T cells may exert a pathological effect through direct cellular contact with monocytes/macrophages, inducing massive up-regulation of interleukin-1 $\beta$  (IL-1 $\beta$ ) and tumor-necrosis factor (TNF) [1–3]. Indeed, the levels of T cell contact-induced production of IL-1 $\beta$  and TNF are comparable to those observed with optimal doses of lipopolysaccharides (LPS), a stimulus related to acute/infectious inflammation [2]. Besides triggering pro-inflammatory cytokine production, contact-mediated activation of monocytes induces the production and/or shedding of cytokine inhibitors such

as secreted IL-1 receptor antagonist (sIL-1Ra) and soluble receptors of IL-1 and TNF [4–7]. Since T cells isolated from inflamed rheumatoid arthritis synovium constitutively display the ability to induce cytokine production in human monocytes *in vitro* [8], this mechanism is likely to occur also *in vivo* and thus to be involved in the pathogenesis of chronic inflammatory disorders leading to tissue destruction. The importance of T cell contact-mediated activation of monocytes/macrophages in chronic inflammatory conditions was further borne out by the modulation occurring after drugs were administered to patients for treatment. Indeed, interferon  $\beta$  (IFN $\beta$ ) and glatiramer acetate, *i.e.*, both immunomodulators used to treat multiple sclerosis, modulate the production of IL-1 $\beta$  and sIL-1Ra in T cell contact-activated monocytes in a manner that correlates with measurements in treated patients [9,10]. This also applies to leflunomide which is used to treat rheumatoid arthritis patients [11].

In chronic inflammation, after extravasation, most T cells remain in the perivascular region, and other infiltrating cells such as monocytes/macrophages and neutrophils have to cross the perivascular layer of T cells to make contact with the latter cells before

penetrating further into the target tissue. Consequently, direct cell-cell contact with T cells is less frequent outside perivascular regions. However, cells can disseminate cell surface molecules by generating microparticles and thus ensure “distant” cellular contact. Microparticles are fragments (0.1–0.8  $\mu\text{m}$  diameter) shed from the plasma membrane of stimulated or apoptotic cells. We recently determined that microparticles generated by stimulated T cells display an ability to activate monocytes that is similar to that displayed by membranes of stimulated T cells or soluble extracts of the latter [12]. High-density lipoproteins (HDL) specifically inhibit the induction of IL-1 $\beta$  and TNF in monocytes activated by cellular contact with stimulated T cells [13]. This anti-inflammatory function of HDL proved to be due to their main protein component, apolipoprotein A-I (apo A-I), which binds activating factors at the surface of stimulated T cells [13]. In vivo, apo A-I infiltration into inflamed rheumatoid arthritis joints might lower the production of pro-inflammatory cytokines [14]. Of note, contrary to the production of IL-1 $\beta$  and TNF, that of the anti-inflammatory cytokine sIL-1Ra induced by contact with stimulated T cells is not affected by HDL [12]. It follows that stimulated T cells activate different monocyte functions by expressing surface molecules. The activity of the latter may be inhibited or not by HDL.

This study was undertaken to identify molecules that are induced in monocytes by cellular contact with stimulated T cells and inhibited in the presence of HDL. The experimental approach involved multiplex measurement of cytokines, chemokines and growth factors produced by activated monocytes, as well as microarray profiling. Studies of cell-cell interactions such as those occurring in T cell contact-activation of human monocytes are usually complicated by the simultaneous presence of at least two viable cell types. To obviate this problem and possible interferences due to potentially phagocytic target cells, isolated membranes from stimulated HUT-78 cells were solubilized and used as a stimulus referred to as CE<sub>sHUT</sub> [9]. HUT-78 cells have previously been shown to activate monocytes to a similar extent as freshly isolated T lymphocytes [2]. The results show that direct contact with stimulated T cells induces the expression of genes mostly related to inflammatory pathways but different from those induced under acute/infectious inflammatory conditions (*e.g.*, induced by LPS), and that HDL inhibit the expression of pro- rather than anti-inflammatory molecules.

## Results

### Apolipoprotein A-I Is the HDL Component Displaying Inhibitory Activity

We previously demonstrated that apolipoprotein A-I was the HDL component that inhibited T cell contact-activation of monocytes [13]. Since HDL preparations may contain several particle subpopulations, we first ascertained that the inhibitory activity of the HDL preparation used in this study was due to apo A-I. As shown in Figure 1, the inhibitory activity of HDL was reversed in a dose-dependent manner by antibodies to apo A-I. Antibodies to apo A-I alone did not affect IL-1 $\beta$  and TNF production by human monocytes. Similarly, they did not change CE<sub>sHUT</sub>-induced production of IL-1 $\beta$  or TNF in the absence of HDL. Isotype IgG used as control did not display any effect (not shown). This further confirms that apo A-I was indeed the inhibitory component of HDL.

### HDL Inhibit CE<sub>sHUT</sub>-Induced Inflammatory Cytokine Production in Human Monocytes

To ascertain the anti-inflammatory functions of HDL in chronic inflammatory conditions, human monocytes were activated by CE<sub>sHUT</sub> in the presence or absence of HDL. Culture supernatants

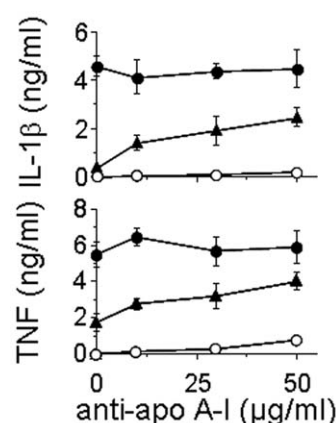

**Figure 1. Apo A-I mediates the inhibitory effects of HDL in T cell contact-induced cytokine production in monocytes.** Monocytes ( $5 \times 10^4$  cells/200  $\mu\text{l}$ /well; 96-well plates) were activated (closed symbols) or not (open circles) by CE<sub>sHUT</sub> for 24 h in the presence (triangles) or absence (circles) of HDL. Cell culture supernatants were tested by Quantikine kits (R&D) for the presence of IL-1 $\beta$  and TNF. Results are expressed as mean  $\pm$  SD of a representative experiment carried out in triplicate.  
doi:10.1371/journal.pone.0009418.g001

were analyzed for the production of cytokines, chemokines and growth factors using a 27-Plex kit (BioRad). Fifteen factors out of 27 were not significantly induced by CE<sub>sHUT</sub>, including cytokines specifically produced by T cells (*i.e.*, IL-2, IL-4, IL-5, IL-9, IL-13, and IL-17), cytokines and chemokines produced by a variety of cells (*i.e.*, IL-7, IL-10, IL-12, IL-15, CCL11 and CXCL10) and growth factors (*i.e.*, basic fibroblast growth factor – FGF, platelet-derived growth factor – PDGF, vascular endothelial growth factor – VEGF). As shown in Figure 2, the production of 12 out of 27 measured factors was induced by CE<sub>sHUT</sub> including IL-1 $\beta$ , TNF and IL-1Ra. In contrast to sIL-1Ra production, that of IL-1 $\beta$  and TNF was inhibited by HDL (Figure 2A), corroborating previous results. In addition, CE<sub>sHUT</sub> induced monocytes to produce factors involved in their localization, survival and differentiation such as CCL5 (RANTES), CCL2 (MCP-1), interferon- $\gamma$  (IFN $\gamma$ ), granulocyte-macrophage colony-stimulating factor (GM-CSF), and macrophage-CSF (M-CSF). The production of the latter was moderate and it was not affected by HDL (Figure 2B). In contrast, CE<sub>sHUT</sub> strongly induced the production of cytokines and chemokines that display robust pro-inflammatory functions, *i.e.*, IL-6, IL-8, CCL3 (MIP-1 $\alpha$ ) and CCL4 (MIP-1 $\beta$ ), the latter being inhibited in the presence of HDL (Figure 2C). These data demonstrate that direct cellular contact with stimulated T cells (mimicked by CE<sub>sHUT</sub>) induced the production of many factors in addition to that of IL-1 $\beta$ , TNF and sIL-1Ra that had previously been studied. However, CE<sub>sHUT</sub> was not a general activator of monocytes, it rather activated specific pathways relevant to inflammation. The premise that HDL mainly inhibited pro-inflammatory rather than anti-inflammatory factors strengthens the claim to their anti-inflammatory functions. Together, these results suggest that CE<sub>sHUT</sub> triggered the expression of multiple factors in human monocytes, some of whose expression was modulated by HDL. This prompted us to conduct a microarray analysis to define genes whose expression was triggered by CE<sub>sHUT</sub> and inhibited in the presence of HDL.

### Modulation of IL-1 $\beta$ Transcript Expression by CE<sub>sHUT</sub> and HDL

Microarray analysis was carried out with monocytes prepared from 3 different human donors. The activation stage of monocytes

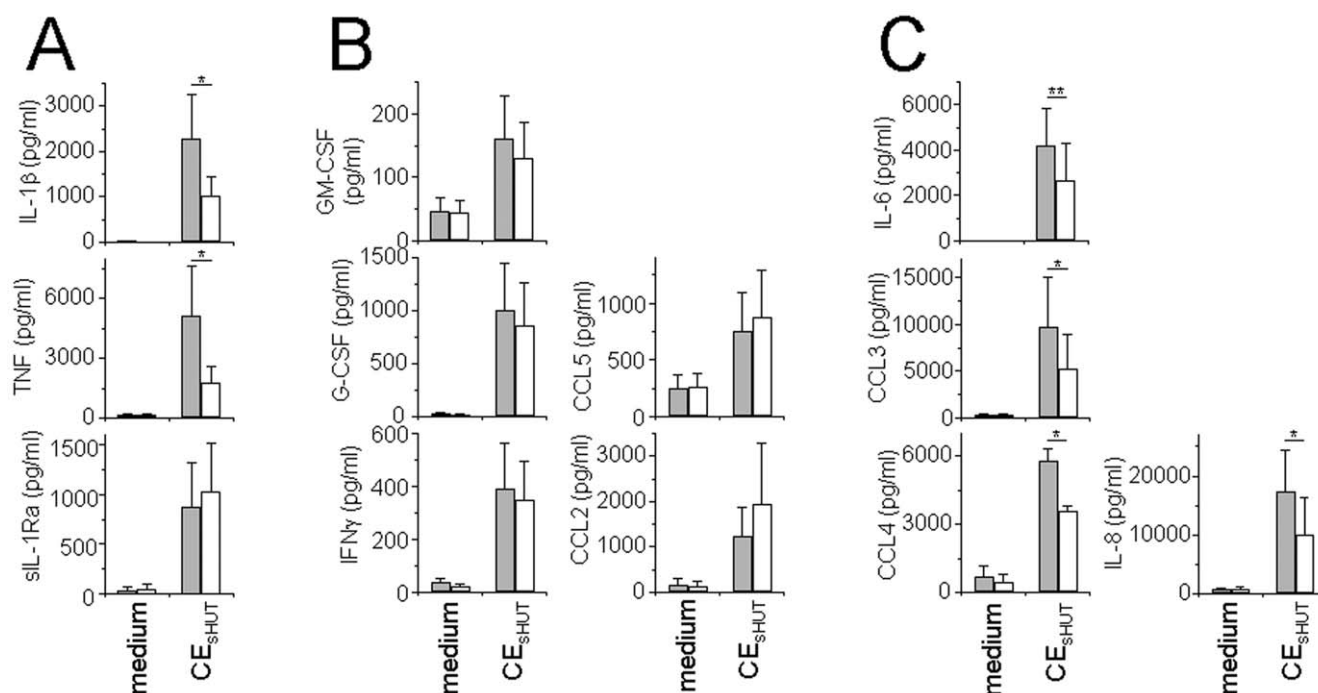

**Figure 2. Modulation of cytokine production by HDL in  $CE_{sHUT}$ -activated monocytes.** Monocytes ( $5 \times 10^4$  cells/200  $\mu$ l/well; 96-well plates) were activated by  $CE_{sHUT}$  for 24 h in the presence (empty columns) or absence (grey columns) of HDL. Cell culture supernatants were tested for the presence of the indicated cytokines by BioPlex using a 27-Plex kit. Results were obtained from monocytes isolated from 3 individual donors and are expressed as mean  $\pm$  SD ( $n = 3$ ). (A) Cytokines previously shown to be modulated by  $CE_{sHUT}$ ; (B)  $CE_{sHUT}$ -induced cytokines whose expression was not modulated by HDL; and (C)  $CE_{sHUT}$ -induced cytokines whose expression was inhibited in the presence of HDL.  
doi:10.1371/journal.pone.0009418.g002

was ascertained by measuring the levels of IL-1 $\beta$  mRNA whose modulations in the present settings are well known [12,13]. As shown by qPCR,  $CE_{sHUT}$  induced the expression of IL-1 $\beta$  mRNA in the 3 monocyte preparations (Figure 3A). Although they differed depending on monocyte preparation, the IL-1 $\beta$  transcript levels were more than 2-fold higher in monocytes activated by  $CE_{sHUT}$  than in resting monocytes. In the presence of HDL, the  $CE_{sHUT}$ -induced IL-1 $\beta$  transcript levels of donors a and b reverted to basal levels (Figure 3Aa and 3Ab) while those of donor c were inhibited by 83% (Figure 3Ac). Although these data validated the experiments for microarray analysis, the induction of IL-1 $\beta$  transcript levels differed from that observed by qPCR (Figure 3B). Indeed, none of the two *IL1B* probe sets generated signal enhancement or inhibition by HDL that reached the 2-fold cut-off in any of the monocyte preparations, although the mean enhancement (1.55- and 1.48-fold) induced by  $CE_{sHUT}$  reverted completely in the presence of HDL. However, levels of the TNF transcript as determined by microarray analysis were similar to those previously obtained by qPCR [12], validating monocyte activation by  $CE_{sHUT}$  and inhibition by HDL in the 3 experiments. The discrepancy between qPCR and microarray measurements of IL-1 $\beta$  transcript levels was likely to be due to high signal values observed in resting monocytes for the 2 *IL1B* probe sets in microarray analysis (Figure 4). With such saturating signals, neither enhancement nor inhibition could be determined with accuracy. This was not true for TNF and two out of five IL-1Ra probe sets that were in the range where signal variations were optimal (Figure 4).

#### Comparison of Microarray Analysis of Gene Expression with Protein Production

In order to corroborate results from measuring protein production and gene expression, results shown in Figure 2 were compared to those of microarray analysis. There was no

enhancement of gene expression for cytokines, chemokines and growth factors that were not detected in supernatants of  $CE_{sHUT}$ -activated monocytes (*i.e.*, IL-7, IL-10, IL-12, IL-15, CCL11, FGF, and VEGF) with the exception of PDGF- $\beta$  and CXCL10. Indeed, the signals of *PDGFB* and *CXCL10* probe sets were enhanced respectively by factors of  $2.88 \pm 0.26$  and  $20.09 \pm 21.42$  in monocytes activated by  $CE_{sHUT}$  (Table S1), whereas proteins did not reach the detection limit in cell supernatants. This discrepancy could not be explained for CXCL10; however, the premise that PDGF is a heterodimer of PDGF- $\alpha$  and - $\beta$  and *PDGFA* transcript remained undetectable in both resting and activated monocytes, might explain that PDGF was not detected in monocyte supernatants. In contrast, signals of probe sets for CCL5, G-CSF (*CSF3*) and GM-CSF (*CSF2*) that were measured in supernatants of  $CE_{sHUT}$ -activated monocytes were not increased. This might be due to the time-course of the latter gene expression, the transcript being measured after 3 h of monocyte activation and that of secreted proteins after 24 h. Thus, the transcription of these genes might be delayed. Interestingly, factors displaying anti-inflammatory functions such as IL-10 and TGF $\beta$  were not induced, the signal of the *TGFB* probe set being even diminished 2.84-fold (Table S1). The probe set of IL-23  $\alpha$ -subunit (*IL23A*) was enhanced 18.24-fold, whereas IL-23 was not detectable in supernatants of  $CE_{sHUT}$ -activated monocytes. This was not due to an incapacity of monocytes to produce IL-23, since the same monocyte preparations yielded  $781 \pm 572$  pg/ml IL-23 (mean  $\pm$  SD,  $n = 3$ ) when activated by 100 ng/ml LPS (not shown). Interestingly, probe sets for IL-12  $\alpha$ - and  $\beta$ -subunits were not detected in either resting or  $CE_{sHUT}$ -activated monocytes, further suggesting that the active form of IL-23 which is composed of a dimer of IL-23  $\alpha$ -subunit and IL-12  $\beta$ -subunit was not produced by  $CE_{sHUT}$ -activated monocytes. Together, these results corrob-

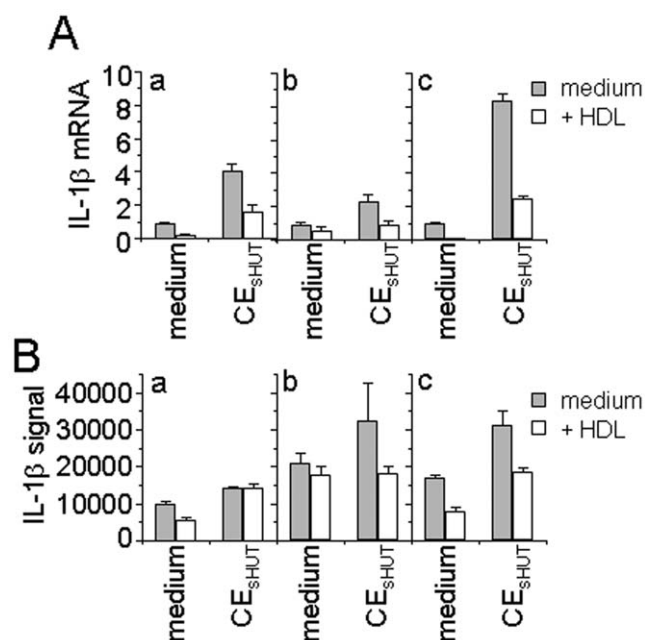

**Figure 3. Inhibition by HDL of CE<sub>sHUT</sub>-triggered IL-1 $\beta$  mRNA.** Monocytes ( $7 \times 10^6$  cells/P-100mm/6 ml) isolated from 3 different donors (a, b and c) were activated by CE<sub>sHUT</sub> (6  $\mu$ g/ml) in the presence (empty columns) or absence (grey columns) of HDL (0.2 mg/ml) for 3 h. (A) Isolated RNA was subjected to qPCR to assess IL-1 $\beta$  transcript levels. Results are presented as mean  $\pm$  SD of triplicates. (B) Isolated RNA was subjected to microarray analysis. Results are expressed as mean  $\pm$  SD,  $n=3$ . doi:10.1371/journal.pone.0009418.g003

orate those obtained by measuring protein secretion in CE<sub>sHUT</sub>-activated monocyte supernatants (Figure 2).

### HDL Mainly Affect the Expression of Molecules Related to Inflammation in CE<sub>sHUT</sub>-Activated Monocytes

Microarray analysis was carried out with the following criteria: 1) since signals differ greatly as a function of monocyte preparation we proceed to paired comparisons within experiment carried out with the same monocyte preparation; 2) probe sets with signals  $<100$  in the CE<sub>sHUT</sub>-activated condition were discarded considered as not different from background; and 3) only probe sets with fold changes  $\leq -2.0$  or  $\geq 2.0$  in at least 2 out of the 3 experiments were considered as affected by CE<sub>sHUT</sub>. By using this strategy, 666 probe sets were identified that were either enhanced (437, *i.e.*, 66%) or decreased (229, *i.e.*, 34%) upon monocyte activation by CE<sub>sHUT</sub> (Figure 4; complete list in Table S1). In the presence of HDL, 1101 probe sets were modulated, 48% (524 probe sets) being increased and 52% (577 probe sets) decreased in [CE<sub>sHUT</sub> + HDL]-activated monocytes (complete list in Table S2). The premise that genes modulated by CE<sub>sHUT</sub> in the presence of HDL were more numerous than in the absence of HDL suggests that the expression of many genes was hampered upon T cell contact-activation of monocytes. Noticeably, 104 genes were significantly induced by CE<sub>sHUT</sub> and not by [CE<sub>sHUT</sub> + HDL], whereas 168 genes were increased by [CE<sub>sHUT</sub> + HDL] and not by CE<sub>sHUT</sub>. Ingenuity Pathway Analysis (IPA) for genes whose expression was exclusive to one or the other condition demonstrate that genes induced by CE<sub>sHUT</sub> were mainly related to inflammation whereas this correlation was poorer for genes uniquely induced by [CE<sub>sHUT</sub> + HDL], both in terms of gene number and fitting to IPA defined pathways, *i.e.*,  $p$ -values (Table 1). HDL per se affected the expression of only 92 probe sets (39 increased, 53 decreased) in human monocytes (see

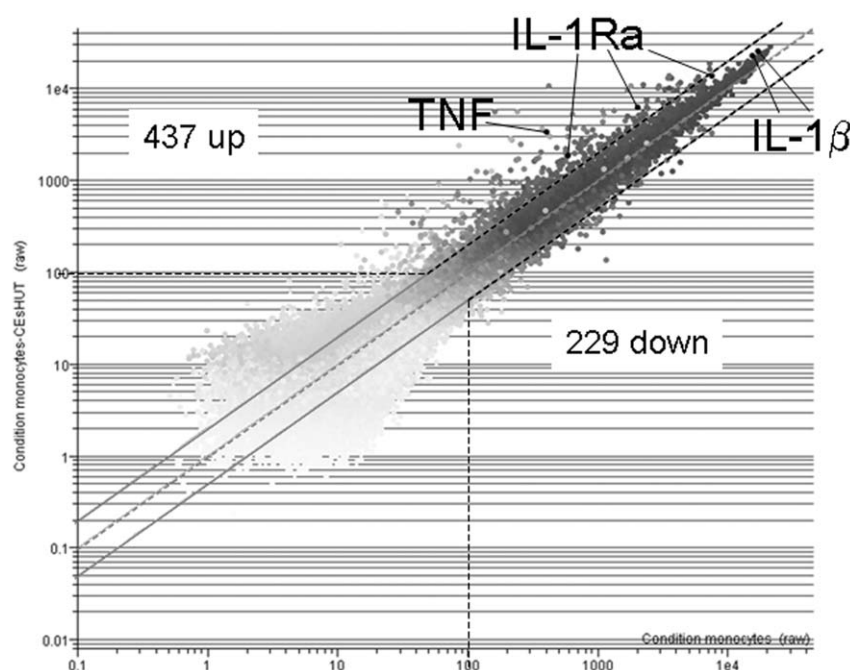

**Figure 4. Analysis of gene expression in monocytes activated by CE<sub>sHUT</sub>.** Total RNA was used in Affymetrix microarrays to analyse gene expression. The scatter plot (GeneSpring) shows the amounts expressed in CE<sub>sHUT</sub>-activated monocytes (y-axis) as a function of amounts expressed in resting monocytes (x-axis), applying a cut-off of 2.0. Each dot represents one probe set; probe sets for IL-1 $\beta$ , IL-1 $\alpha$  and TNF are indicated. Probe sets with signals below 100 were discarded (dashed lines). Using the latter criteria, 437 probe sets were up-regulated, and 229 down-regulated as indicated. doi:10.1371/journal.pone.0009418.g004

**Table 1.** IPA Pathways Associated with Genes whose Expression is Exclusive to [CE<sub>sHUT</sub>] or [CE<sub>sHUT</sub> + HDL].

| Condition                  | Diseases and Disorders | p-value*                                      | number |
|----------------------------|------------------------|-----------------------------------------------|--------|
| [CE <sub>sHUT</sub> ]      | Inflammatory Response  | $5.2 \times 10^{-9}$ – $2.85 \times 10^{-3}$  | 25     |
|                            | Inflammatory Diseases  | $1.66 \times 10^{-7}$ – $2.82 \times 10^{-3}$ | 32     |
| [CE <sub>sHUT</sub> + HDL] | Inflammatory Response  | $1.22 \times 10^{-4}$ – $9.52 \times 10^{-3}$ | 23     |
|                            | Inflammatory Diseases  | $1.16 \times 10^{-3}$ – $9.52 \times 10^{-3}$ | 11     |

The 104 genes increased exclusively in monocytes activated by CE<sub>sHUT</sub> ([CE<sub>sHUT</sub>]) and the 168 genes increased exclusively in monocytes activated by CE<sub>sHUT</sub> in the presence of HDL ([CE<sub>sHUT</sub> + HDL]) were subjected to IPA analysis. The table displays the number of genes related to inflammation. The significance is expressed as range of p values based on Fisher's exact test.

doi:10.1371/journal.pone.0009418.t001

complete list in Table S3). Alike *IL1B* some genes (probe sets) displayed high basal expression in resting monocytes (Figure 3 and 4). To take into account basal signals, we chose to compare signal ratios (fold changes) of “CE<sub>sHUT</sub> versus medium” condition to “[CE<sub>sHUT</sub> + HDL] versus medium” condition by pair, *i.e.*, fold changes in “CE<sub>sHUT</sub> versus medium” condition were compared to fold changes in “[CE<sub>sHUT</sub> + HDL] versus medium” condition in each experiment and the mean value was taken into account to determine the difference in probe set signals induced by CE<sub>sHUT</sub> alone or by CE<sub>sHUT</sub> in the presence of HDL. As presented in Table S4, 164 probe sets representing 113

molecules displayed  $\geq 1.4$ -fold higher levels in [CE<sub>sHUT</sub>] than in [CE<sub>sHUT</sub> + HDL] condition demonstrating that their induced expression was inhibited by HDL. To validate these results and our calculation strategy, genes were chosen from Table S4 and subjected to transcript level measurement by qPCR (Table 2). In addition, IL-1 $\beta$  and IL-8 were added to this list because they both displayed high basal signals in microarray analysis and their protein production was modulated by HDL (Figure 2 and Table 2). As shown in Figure 5, transcripts of the 23 chosen genes were all significantly increased in monocytes activated by CE<sub>sHUT</sub> thus correlating microarray results. Eighteen out of 23 transcripts were inhibited in the presence of HDL. Noticeably, HDL per se diminished the levels of several transcripts in “resting” monocytes including CCL3 and CCL4 (Figure 5), thus correlating results of Table S3. However, the transcript expression of 5 genes, *i.e.*, *IL1RN*, *CISH*, *HAS1*, *ADAP1/CENTA1*, and *ICAM1* was not inhibited in the presence of HDL (Figure 5B). These genes displayed different expression patterns when measured by qPCR or by microarray analysis. No obvious reason could be determined for this discrepancy.

### HDL Inhibit the CE<sub>sHUT</sub>-Induced Expression and Secretion of Non-Protein Compounds

CE<sub>sHUT</sub> not only induced the transcription of genes encoding proteins but also that of non-protein-coding genes such as *MIRHG2/BIC* which is inhibited in the presence of HDL (Table S4). *MIRHG2/BIC* is the microRNA host gene 2 which contains miR-155. In acute inflammation, miR-155 expression is induced

**Table 2.** Genes Chosen for Validation by qPCR.

| Affymetrix ID | Gene Symbol  | Description                                                              | Induction by CE <sub>sHUT</sub><br>(fold change) | Inhibition by<br>HDL (fold change) |
|---------------|--------------|--------------------------------------------------------------------------|--------------------------------------------------|------------------------------------|
| 90265_at      | ADAP1/CENTA1 | Arf-GAP with dual PH domain-containing protein 1 (centaurin, $\alpha$ 1) | 2.30                                             | –2.23                              |
| 205114_s_at   | CCL3         | Chemokine (C-C motif) ligand 3                                           | 3.89                                             | –1.55                              |
| 204103_at     | CCL4         | Chemokine (C-C motif) ligand 4                                           | 2.64                                             | –2.00                              |
| 223961_s_at   | CISH         | Cytokine inducible SH2-containing protein (CIS)                          | 4.91                                             | –2.29                              |
| 209716_at     | CSF1         | Macrophage-colony stimulating factor 1 (M-CSF)                           | 10.86                                            | –5.19                              |
| 226201_at     | DOT1L        | Histone-lysine N-methyltransferase, H3 lysine-79 specific                | 2.17                                             | –2.90                              |
| 208893_s_at   | DUSP6        | Dual specificity phosphatase 6                                           | 3.78                                             | –2.21                              |
| 222802_at     | EDN1         | Endothelin 1                                                             | 5.03                                             | –3.80                              |
| 207316_at     | HAS1         | Hyaluronan synthase 1                                                    | 3.52                                             | –1.95                              |
| 202638_s_at   | ICAM1        | Intracellular adhesion molecule 1 (CD54)                                 | 2.22                                             | –1.90                              |
| 212659_s_at   | IL1RN        | Interleukin-1 receptor antagonist                                        | 3.69                                             | –4.30                              |
| 205207_at     | IL6          | Interleukin-6                                                            | 3.18                                             | –1.70                              |
| 204926_at     | INHBA        | Inhibin, beta A (activin A, activin AB alpha polypeptide)                | 8.38                                             | –2.17                              |
| 1560397_s_at  | KLHL6        | Kelch-like 6                                                             | 2.31                                             | –2.63                              |
| 206267_s_at   | MATK         | Megakaryocyte-associated tyrosine kinase                                 | 3.60                                             | –3.09                              |
| 207091_at     | P2RX7        | P2X purinoceptor 7 (ATP receptor)                                        | 2.77                                             | –1.53                              |
| 210845_s_at   | PLAUR        | Urokinase plasminogen activator surface receptor                         | 2.57                                             | –1.41                              |
| 209325_s_at   | RGS16        | Regulator of G-protein signaling 16                                      | 11.15                                            | –4.36                              |
| 238729_x_at   | SAV1         | Protein salvador homolog 1                                               | 10.18                                            | –2.26                              |
| 204011_at     | SPRY2        | Protein sprouty homolog 2                                                | 24.82                                            | –2.02                              |
| 207113_s_at   | TNF          | Tumor necrosis factor $\alpha$                                           | 7.85                                             | –2.06                              |
| 205067_at     | IL1B         | Interleukin 1 $\beta$                                                    | 1.55                                             | –1.42                              |
| 202859_x_at   | IL8          | Interleukin 8                                                            | 1.30                                             | –1.31                              |

doi:10.1371/journal.pone.0009418.t002

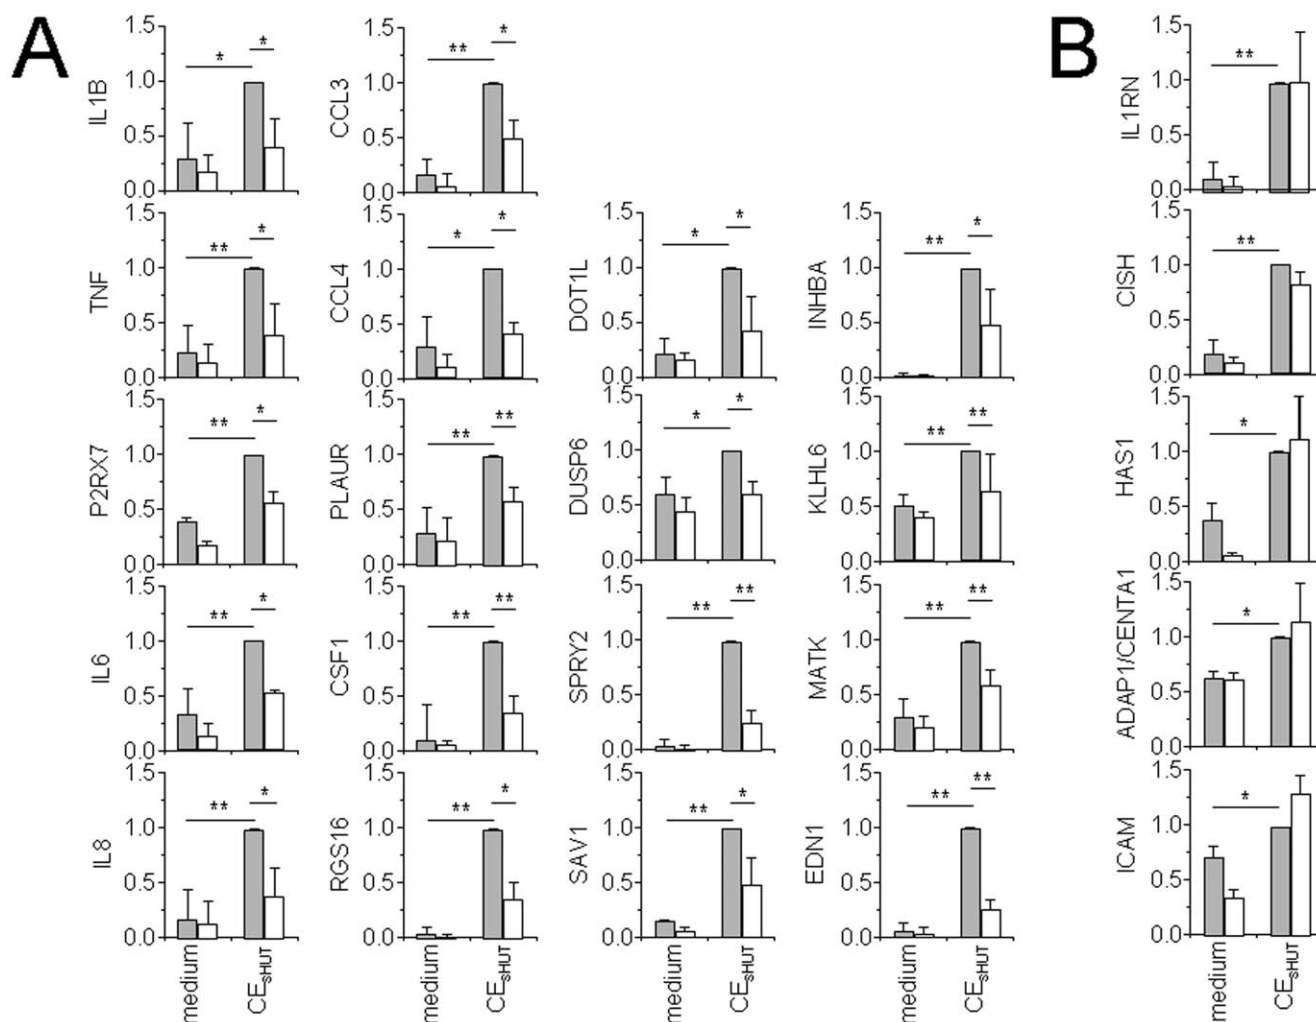

**Figure 5. qPCR assessment of selected transcripts to validate microarray results.** Several genes listed in Table S4 were selected and RNA, isolated from the 3 monocyte preparations, was subjected to qPCR. (A) Genes that were validated (*i.e.*, those displaying similar behavior as in microarray analysis). (B) Genes that were not validated. Results were normalized to fully activated condition ( $CE_{sHUT}$ ), considered to be 1. Data are expressed as mean  $\pm$  SD,  $n=3$ ; \*\*  $p<0.01$ ; \*  $p<0.05$ . doi:10.1371/journal.pone.0009418.g005

by LPS and participates in the up-regulation of IL-1 $\beta$  and TNF in LPS-activated dendritic cells [15]. Since miR-155 plays an important part in inflammatory processes, its induction by  $CE_{sHUT}$  and inhibition by HDL were assessed by qPCR. As illustrated in Figure 6A, miR-155 expression was indeed induced by  $CE_{sHUT}$  and inhibited in the presence of HDL, thus validating the microarray results (Table S4). Furthermore,  $CE_{sHUT}$  induced the expression of enzymes involved in the synthesis of non-protein pro-inflammatory compounds such as eicosanoids. To determine whether the induction of cyclooxygenase-2 (COX-2) transcript by  $CE_{sHUT}$  and its inhibition by HDL (Table S4) were associated with the expression of a functional enzyme, we tested monocyte supernatants for the production of its product, *i.e.*, prostaglandin  $E_2$  ( $PGE_2$ ). As shown in Figure 6B,  $CE_{sHUT}$ -activated monocytes did indeed produce  $PGE_2$ , which production was inhibited in the presence of HDL. Together, the results presented in Figure 6 further point to contact with stimulated T cells as a pro-inflammatory stimulus of monocytes that does not only induce cytokines but also non-protein components such as microRNAs and prostaglandins related to inflammation.

## HDL Inhibited the Expression of Genes Involved in Inflammatory Processes

In order to establish that HDL mainly affected inflammatory functions, we ran an IPA comparing the following conditions:  $CE_{sHUT}$  versus medium (666 probe sets) and [ $CE_{sHUT}$ +HDL] versus medium (1101 probe sets, Table S2). The analysis revealed that among the biofunctions that were modulated by cellular contact with stimulated T cells, those that were inhibited by HDL related mainly to inflammation and immunity (Figure 7). Of the genes associated with “Diseases and Disorders” (according to IPA), those correlated to inflammatory response and inflammatory diseases in  $CE_{sHUT}$  (p-values between  $5.25 \times 10^{-20}$  and  $1.28 \times 10^{-5}$ ) were a better match than those in [ $CE_{sHUT}$  + HDL] (p-values between  $7.52 \times 10^{-9}$  and  $6.42 \times 10^{-5}$ ). Of note, genes related to rheumatoid arthritis, atherosclerosis and multiple sclerosis were also attributed by IPA to “Connective Tissue Disorders”, “Cardiovascular Disease”, and “Neurological Disease”, respectively. These genes proved to be a better match in the [ $CE_{sHUT}$ ] conditions than in the [ $CE_{sHUT}$  + HDL] conditions.

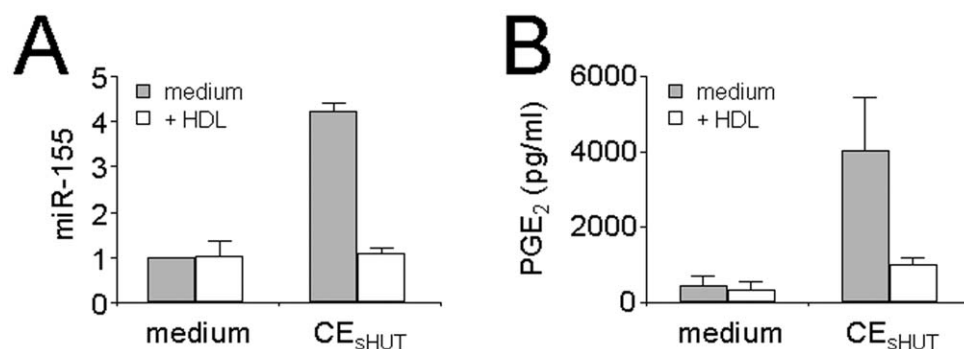

**Figure 6. HDL inhibit miR-155 expression and PGE<sub>2</sub> production induced by CE<sub>sHUT</sub> in human monocytes.** (A) Total RNA isolated from monocytes activated (CE<sub>sHUT</sub>) or not (medium) in the presence (white columns) or absence (grey columns) of HDL and subjected to qPCR analysis for the presence of miR-155. (B) Monocytes were activated as in Figure 2, and PGE<sub>2</sub> production measured in cell supernatants. Results are expressed as mean  $\pm$  SD of 3 different experiments.  
doi:10.1371/journal.pone.0009418.g006

This is further evidence of HDL down-modulating inflammation-related genes in monocytes activated by CE<sub>sHUT</sub>. Genes implicated in cell survival and metabolism, including those related to “cell growth and proliferation”, “cell death”, and “cell cycle”, were only modulated to a small extent or not at all in the presence of HDL (Figure 7B). These results suggest that, in human monocytes, CE<sub>sHUT</sub> mainly affected the expression of molecules related to inflammation and that their expression was inhibited in the presence of HDL. IPA of probe sets, whose signals were increased by CE<sub>sHUT</sub> and decreased by HDL (Table S4), revealed that genes whose CE<sub>sHUT</sub>-induced expression was inhibited by HDL were mainly involved in inflammatory diseases and disorders (Table 3). The global outcome of the IPA of microarray results suggests that CE<sub>sHUT</sub> mainly affected inflammatory and immune functions in human

monocytes and that HDL opposed these functions due to its inhibitory effect.

## Discussion

This study demonstrates that activation of monocytes by cellular contact with stimulated T cells as mimicked by CE<sub>sHUT</sub> is a pro-inflammatory mechanism distinct from that induced by LPS. In addition to the prototypical pro-inflammatory cytokines IL-1 $\beta$  and TNF, CE<sub>sHUT</sub> induces the expression of many genes related to inflammatory processes, thus generating a microenvironment which may contribute to TH17 polarization. HDL does not randomly inhibit T cell contact-activated monocytes but specifically inhibit CE<sub>sHUT</sub>-induced pro-inflammatory genes. In contrast, HDL do not affect or inhibit - or only to a small extent - the

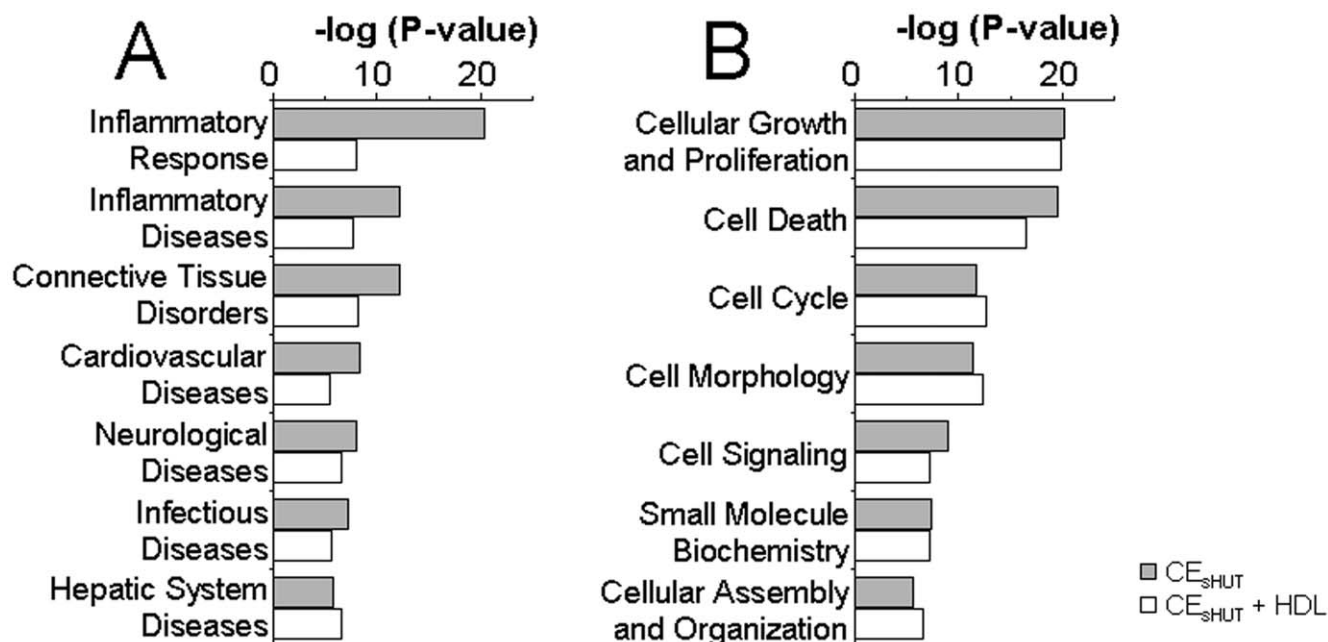

**Figure 7. HDL inhibit inflammatory functions induced by CE<sub>sHUT</sub> in human monocytes.** Microarray results of [CE<sub>sHUT</sub>] versus medium (grey columns) and [CE<sub>sHUT</sub> + HDL] versus medium (empty columns) were subjected to comparative analysis in the IPA system. (A) Genes related to “Diseases and Disorders”; (B) genes related to “Molecular and Cellular Functions”.  
doi:10.1371/journal.pone.0009418.g007



**Table 3.** IPA Pathways Associated with Genes whose CE<sub>sHUT</sub>-Induced Expression is Inhibited by HDL.

| Diseases and Disorders                                         | p-value                                        | number |
|----------------------------------------------------------------|------------------------------------------------|--------|
| Cancer                                                         | $9.19 \times 10^{-17}$ – $2 \times 10^{-6}$    | 59     |
| Inflammatory Diseases                                          | $2.51 \times 10^{-11}$ – $2.35 \times 10^{-6}$ | 41     |
| Hematological Diseases                                         | $2.4 \times 10^{-11}$ – $2.19 \times 10^{-6}$  | 33     |
| Inflammatory Response                                          | $1.97 \times 10^{-15}$ – $2.35 \times 10^{-6}$ | 32     |
| Connective Tissue Disorders or Skeletal and Muscular Disorders | $2.59 \times 10^{-10}$ – $1.91 \times 10^{-6}$ | 29     |
| Reproductive System Diseases                                   | $1.06 \times 10^{-10}$ – $1.87 \times 10^{-6}$ | 28     |
| Neurological Diseases                                          | $1.67 \times 10^{-9}$ – $1.53 \times 10^{-6}$  | 27     |
| Immunological Diseases                                         | $2.4 \times 10^{-11}$ – $2.19 \times 10^{-6}$  | 25     |
| Genetic Disorders                                              | $2.59 \times 10^{-10}$ – $2.35 \times 10^{-6}$ | 25     |
| Dermatological Diseases and Conditions                         | $8.58 \times 10^{-12}$ – $1.11 \times 10^{-6}$ | 21     |
| Cardiovascular Diseases                                        | $4.41 \times 10^{-10}$ – $1.94 \times 10^{-6}$ | 20     |

doi:10.1371/journal.pone.0009418.t003

expression of molecules displaying anti-inflammatory and regulatory functions.

According to Multiplex analysis of soluble factors induced by CE<sub>sHUT</sub>, of the important pro-inflammatory factors, IL-12 is not produced by activated human monocytes. This is substantiated by microarray analysis which failed to reveal transcripts for IL-12p40 (*IL12B*) or IL-12p35 (*IL12A*) in both resting and CE<sub>sHUT</sub>-activated monocytes. This suggests that T cell contact-mediated activation of monocytes does not generate a cytokine environment propitious to Th1 polarization [16]. IL-1β and IL-6 however, which are involved in Th17 differentiation [17], are highly induced by CE<sub>sHUT</sub> in monocytes (Figure 2), suggesting that contact with stimulated T cells might result in a bias towards pro-inflammatory Th17 cells [18]. This is particularly important in view of recent results showing that Th17 rather than Th1 cells display pathogenic functions in chronic inflammatory diseases such as multiple sclerosis and rheumatoid arthritis [19]. Interestingly, LPS, *i.e.*, the prototypical stimulus of acute inflammation, induces IL-12 in human monocytes [20], thus distinguishing the latter inflammatory mechanism from chronic/sterile inflammation which implicates contact with stimulated T cells. Together these observations suggest that T cell contact-activated monocytes might generate a cytokine microenvironment inclined to give rise to a bias towards Th17 at the inflammatory site.

IL-10, whose production is induced upon human monocyte activation by LPS [21], was not detected in CE<sub>sHUT</sub>-activated monocyte supernatants, nor was its transcript detected (*i.e.*, signal <100) in microarray analysis. These results are reminiscent of previous data showing that IL-10 mRNA was not expressed in monocytes activated by membranes of stimulated T cells for 1 or 24 h [22]. Similarly, cytokine-stimulated T lymphocytes, which are comparable to rheumatoid arthritis synovium T lymphocytes [8], fail to trigger IL-10 production in monocytes [23], but not in M-CSF-differentiated macrophages [24]. Together these observa-

tions suggest that T cell contact-induced IL-10 production depends on the differentiation stage of monocytes/macrophages. Since IL-10 is involved in the reduction and resolution of inflammation [25], its lack of production upon T cell contact-activation of monocytes might explain in part the persistence of inflammation in chronic, destructive inflammatory diseases.

The microarray analysis of CE<sub>sHUT</sub>-activated monocytes also identified the up-regulation (4.75-fold) of the *MIRHG2/BIC* probe set. *MIRHG2/BIC* is the host gene of miR-155. The expression of miR-155 was validated by qPCR (Figure 6), demonstrating the enhancement of miR-155 expression ( $4.22 \pm 0.2$ -fold) upon CE<sub>sHUT</sub>-activation of human monocytes and its inhibition to basal levels in the presence of HDL. MicroRNAs have emerged as a major class of gene expression regulators linked to most biological functions. MiR-155 is up-regulated by LPS and other inflammatory mediators [26]. Recently, miR-155 has been identified as a regulator of the Toll-like receptor/interleukin-1 (TLR/IL-1) signalling pathway [15]. Of note, the production of IL-1β and TNF was lower in human miR-155 knock-down dendritic cells than in untransfected cells [15]. Thus, the premise that CE<sub>sHUT</sub> induces the expression of miR-155 which is diminished in the presence of HDL (Tables S1 and S4) lends additional weight to its classification as a pro-inflammatory mechanism. Other genes involved in mRNA stability are induced upon CE<sub>sHUT</sub>-activation of monocytes; they include the exosome component RRP41 [27], whose probe set (*EXOSC4*) levels are inhibited in the presence of HDL.

In addition to cytokines, chemokines and growth factors (Figure 2) COX-2 transcript expression was enhanced 4.88-fold in monocytes activated by CE<sub>sHUT</sub>, suggesting that human monocytes activated by CE<sub>sHUT</sub> may produce eicosanoids. CE<sub>sHUT</sub> induced the production of PGE<sub>2</sub> in monocytes, which was inhibited by HDL (Figure 6). This is in keeping with the premise that COX-2 expression was inhibited in the presence of HDL (Table S4). Together, these data suggest that HDL may inhibit the CE<sub>sHUT</sub>-induced synthesis of eicosanoids, which constitutes an additional argument in favor of their anti-inflammatory action. Since PGE<sub>2</sub> is also involved in Th17 polarization and maintenance [28], this result support the hypothesis that CE<sub>sHUT</sub>-activated monocytes may generate a microenvironment propitious to the generation of Th17 cells.

The production of IL-1β is tightly regulated at several levels by “roadblocks” as defined by Dinarello [29]. The latter include the facilitation of IL-1β processing by the caspase-1 inflammasome through ATP activation of the P2X<sub>7</sub> receptor. As shown in Table S4, the transcription of genes whose proteins are involved in IL-1β processing and secretion was induced by CE<sub>sHUT</sub> and inhibited in the presence of HDL. Indeed, *CIAS1/NLRP3* and *P2RX7* genes that code for NALP-3 and P2X<sub>7</sub> receptor - both involved in the IL-1β secretion process [30] - are induced 3.01- and 2.77-fold, respectively, upon CE<sub>sHUT</sub>-activation, and inhibited in the presence of HDL (Tables S1 and S4). This demonstrates that in addition to inducing the IL-1β transcript, cellular contact with stimulated T cells triggers processes that underlie optimal/detrimental production of IL-1β upon chronic/sterile inflammatory conditions.

The present microarray results were obtained from monocytes activated by CE<sub>sHUT</sub> for 3 h. Although genes might be up- or down-modulated at other time-points, the results of multiplex and ELISA validated most of results seen with cytokine transcripts. Modulation of highly expressed genes (*i.e.*, displaying saturating, basal signals higher than 10,000) like IL-1β and IL-8 might be similarly regulated but are outside the range of the present analysis. However, these consisted mainly of ribosomal protein transcripts. Of the transcripts that might be regulated by extracellular signals, only two were likely to be



modulated by  $CE_{sHUT}$  and inhibited in the presence of HDL, i.e. *IER3* (immediate early response 3) and *FTH1* (ferritin, heavy polypeptide 1). We thus conclude that this analysis includes all genes of interest that are modulated by contact with stimulated T cells at 3 h.

In conclusion, the present results demonstrate that direct cellular contact with stimulated T cells induces pro-inflammatory factors and pathways in human monocytes and that HDL modulates these pathways to take on a less inflammatory pattern.  $CE_{sHUT}$ -activation of monocytes induces conditions that may favor a bias toward Th17 in neighboring T cells. Interestingly, mechanisms able to induce a cytokine environment favoring such a bias, i.e., inflammatory mechanisms which do not induce IL-12 production, have been poorly described although TLR2 ligands such as zymosan might favor IL-23 rather than IL-12 production [31]. This highlights the importance of this mechanism in chronic/sterile inflammatory diseases such as multiple sclerosis and rheumatoid arthritis, and in turn the role of its specific inhibition by HDL. Activation of human monocytes by contact with stimulated T cells might be a clue to the mechanisms underlying systemic chronic/sterile inflammatory conditions which remain poorly understood, but clearly do not seem to fit the classical pattern of transition from acute to chronic inflammation [32,33].

## Materials and Methods

### Materials

Fetal calf serum (FCS), streptomycin, penicillin, L-glutamine, RPMI-1640, and PBS free of  $Ca^{2+}$  and  $Mg^{2+}$  (Gibco, Paisley, Scotland); purified phytohemagglutinin (PHA) (EY Laboratories, San Marco, CA); TriReagent, phorbol myristate acetate (PMA), polymyxin B sulfate (Sigma Chemicals Co., St. Louis, MO); and goat anti-apolipoprotein A-I antibodies and IgG (Academy Bio-medical Co.) were purchased from the designated suppliers. Other reagents were of analytical grade or better.

### Monocytes

Peripheral blood monocytes were isolated from buffy coats of healthy blood donors as previously described [13]. In order to rule out activation by endotoxins, polymyxin B (2  $\mu$ g/ml) was added to all solutions during the isolation procedure.

### T Cell Stimulation, and Plasma Membrane Isolation and Solubilization

The human T cell line HUT-78 was obtained from the ATCC (Rockville, MD). Cells were maintained in RPMI-1640 medium supplemented with 10% heat-inactivated FCS, 50  $\mu$ g/ml streptomycin, 50 IU/ml penicillin and 2 mM L-glutamine in 5%  $CO_2$ -air humidified atmosphere at 37°C. HUT-78 cells ( $2 \times 10^6$  cells/ml) were stimulated for 6 h by PHA (1  $\mu$ g/ml) and PMA (5 ng/ml). Plasma membranes of stimulated or unstimulated HUT-78 cells were prepared and solubilized in 8 mM CHAPS as previously described [9,34]. CHAPS extracts of membranes from stimulated HUT-78 cells were referred to as  $CE_{sHUT}$  [12].

### Isolation of HDL

Human serum HDL were isolated as previously described [13]. In order to optimize the inhibitory effect of HDL, they were mixed with the stimulus prior to addition to monocytes.

### Cytokine Production

Monocytes ( $5 \times 10^4$  cells/well/200  $\mu$ l) were activated or not with 6  $\mu$ g/ml  $CE_{sHUT}$  in RPMI 1640 medium supplemented with 10%

heat-inactivated FCS, 50  $\mu$ g/ml streptomycin, 50 U/ml penicillin, 2 mM L-glutamine and 5  $\mu$ g/ml polymyxin B sulfate (medium) in 96-well plates and cultured for 24 h. The production of cytokines was measured in culture supernatants by Bio-Plex® analysis (Human Cytokine 27-Plex Panel, BioRad). Alternatively, some cytokines were determined by commercially available kits, Quantikine® from R&D.

### PGE<sub>2</sub> Production

Monocytes ( $5 \times 10^4$  cells/well/200  $\mu$ l) were activated or not with 6  $\mu$ g/ml  $CE_{sHUT}$  in RPMI 1640 medium supplemented with 10% heat-inactivated FCS, 50  $\mu$ g/ml streptomycin, 50 U/ml penicillin, 2 mM L-glutamine and 5  $\mu$ g/ml polymyxin B sulfate (medium) in 96-well plates and cultured for 24 h. The production of PGE<sub>2</sub> was measured as described previously [35].

### Quantitative Real-Time PCR

Quantitative real-time duplex PCR analysis (qPCR) was conducted as previously described [36]. The mRNA expression levels were normalized with the expression of a housekeeping gene (18S) analyzed simultaneously. All probes were purchased from Applied Biosystems. Measurements were conducted in triplicates. miR-155 presence was ascertained by a commercially available kit (TaqMan MicroRNA assay, has-miR-155, Applied Biosystems) according to supplier's instructions.

### Microarray Analysis

Fourteen million of human monocytes ( $7 \times 10^6$  cells/100 mm petri dish/6 ml) isolated from 3 normal blood donors were activated or not for 3 h by 6  $\mu$ g/ml  $CE_{sHUT}$  in the presence or absence of 0.2 mg/ml HDL. When  $CE_{sHUT}$  was not added, its volume was compensated by PBS containing 8 mM CHAPS. Total RNA was isolated and processed using the RNeasy extraction kit (Qiagen), according to manufacturer's protocol. RNA was tested for integrity by capillary electrophoresis (2100 Bioanalyzer, Agilent) and used for the synthesis of biotin-labeled cRNA in accordance with the two-cycle target labeling protocol developed by Affymetrix (GeneChip® Eukaryotic Small Sample Target Labeling Assay Version II, Affymetrix). Biotin-labeled cRNA was hybridized to Affymetrix GeneChip® HG-U133 plus 2.0 containing 54,675 distinct probe sets. Three chips were hybridized and scanned, each corresponding to one donor, for each condition. Signal values and detection calls (present, marginal or absent) for each probe set were determined using the Affymetrix MAS5.0 algorithm. When required, the resulting lists of genes were subjected to analysis by Ingenuity Pathway Analysis (IPA, version 7.5, <http://www.ingenuity.com/>). IPA is a software application for associating genes that are part of a common regulatory biological network and thus for setting up, analyzing and understanding complex biological systems.

### Statistics

Where required, significance of differences between groups was assessed using Student's t test.

### Supporting Information

**Table S1** Probe sets whose signal was modified in the presence of  $CE_{sHUT}$ .

Found at: doi:10.1371/journal.pone.0009418.s001 (1.33 MB DOC)

**Table S2** Probe sets whose signal was affected in the presence of  $CE_{sHUT}$  and HDL.

Found at: doi:10.1371/journal.pone.0009418.s002 (1.76 MB DOC)

**Table S3** Probe sets whose signal was modulated by HDL.

Found at: doi:10.1371/journal.pone.0009418.s003 (0.15 MB DOC)

**Table S4** Probe sets whose signals was lower in monocytes activated by CE<sub>s</sub>HUT + HDL than in monocytes activated by CE<sub>s</sub>HUT.

Found at: doi:10.1371/journal.pone.0009418.s004 (0.29 MB DOC)

## References

- Vey E, Zhang JH, Dayer JM (1992) IFN-gamma and 1,25(OH)<sub>2</sub>D<sub>3</sub> induce on THP-1 cells distinct patterns of cell surface antigen expression, cytokine production, and responsiveness to contact with activated T cells. *J Immunol* 149: 2040–2046.
- Burger D (2000) Cell contact-mediated signaling of monocytes by stimulated T cells: a major pathway for cytokine induction. *Eur Cytokine Netw* 11: 346–353.
- Burger D, Dayer JM, Molnarfi N (2007) Cell contact dependence of inflammatory events. In: Smolen JS, Lipsky PE, eds. *Contemporary Targeted Therapies in Rheumatology*. Abingdon/UK: Taylor & Francis Books Ltd. pp 85–103.
- Vey E, Dayer JM, Burger D (1997) Direct contact with stimulated T cells induces the expression of IL-1 beta and IL-1 receptor antagonist in human monocytes. Involvement of serine/threonine phosphatases in differential regulation. *Cytokine* 9: 480–487.
- Vey E, Burger D, Dayer JM (1996) Expression and cleavage of tumor necrosis factor-alpha and tumor necrosis factor receptors by human monocytic cell lines upon direct contact with stimulated T cells. *Eur J Immunol* 26: 2404–2409.
- Chizzolini C, Chicheportiche R, Burger D, Dayer JM (1997) Human Th1 cells preferentially induce interleukin (IL)-1beta while Th2 cells induce IL-1 receptor antagonist production upon cell/cell contact with monocytes. *Eur J Immunol* 27: 171–177.
- Coclet-Ninin J, Dayer JM, Burger D (1997) Interferon-beta not only inhibits interleukin-1 beta and tumor necrosis factor-alpha but stimulates interleukin-1 receptor antagonist production in human peripheral blood mononuclear cells. *Eur Cytokine Netw* 8: 345–349.
- Brennan FM, Hayes AL, Ciesielski CJ, Green P, Foxwell BM, et al. (2002) Evidence that rheumatoid arthritis synovial T cells are similar to cytokine-activated T cells: involvement of phosphatidylinositol 3-kinase and nuclear factor kappaB pathways in tumor necrosis factor alpha production in rheumatoid arthritis. *Arthritis Rheum* 46: 31–41.
- Molnarfi N, Gruaz L, Dayer JM, Burger D (2007) Opposite regulation of IL-1beta and secreted IL-1 receptor antagonist production by phosphatidylinositol-3 kinases in human monocytes activated by lipopolysaccharides or contact with T cells. *J Immunol* 178: 446–454.
- Burger D, Molnarfi N, Weber MS, Brandt KJ, Benkhoucha M, et al. (2009) Glatiramer acetate increases IL-1 receptor antagonist but decreases T cell-induced IL-1beta in human monocytes and multiple sclerosis. *Proc Natl Acad Sci U S A* 106: 4355–4359.
- Déage V, Burger D, Dayer JM (1998) Exposure of T lymphocytes to leflunomide but not to dexamethasone favors the production by monocytic cells of interleukin-1 receptor antagonist and the tissue-inhibitor of metalloproteinases-1 over that of interleukin-1beta and metalloproteinases. *Eur Cytokine Netw* 9: 663–668.
- Scanu A, Molnarfi N, Brandt KJ, Gruaz L, Dayer JM, et al. (2008) Stimulated T cells generate microparticles, which mimic cellular contact activation of human monocytes: differential regulation of pro- and anti-inflammatory cytokine production by high-density lipoproteins. *J Leukoc Biol* 83: 921–927.
- Hyka N, Dayer JM, Modoux C, Kohno T, Edwards CK3, et al. (2001) Apolipoprotein A-I inhibits the production of interleukin-1beta and tumor necrosis factor-alpha by blocking contact-mediated activation of monocytes by T lymphocytes. *Blood* 97: 2381–2389.
- Bresnahan B, Gogarty M, Fitzgerald O, Dayer JM, Burger D (2004) Apolipoprotein A-I infiltration in rheumatoid arthritis synovial tissue: a control mechanism of cytokine production? *Arthritis Res Ther* 6: R563–R566.
- Ceppi M, Pereira PM, Dunand-Sauthier I, Barras E, Reith W, et al. (2009) MicroRNA-155 modulates the interleukin-1 signaling pathway in activated human monocyte-derived dendritic cells. *Proc Natl Acad Sci U S A* 106: 2735–2740.
- Moser M, Murphy KM (2000) Dendritic cell regulation of TH1-TH2 development. *Nat Immunol* 1: 199–205.
- Acosta-Rodriguez EV, Rivino L, Geginat J, Jarrossay D, Gattorno M, et al. (2007) Surface phenotype and antigenic specificity of human interleukin 17-producing T helper memory cells. *Nat Immunol* 8: 639–646.
- Sallusto F, Lanzavecchia A (2009) Human Th17 cells in infection and autoimmunity. *Microbes Infect* 11: 620–624.
- Miossec P (2009) IL-17 and Th17 cells in human inflammatory diseases. *Microbes Infect* 11: 625–630.
- Aste-Amezaga M, Ma X, Sartori A, Trinchieri G (1998) Molecular mechanisms of the induction of IL-12 and its inhibition by IL-10. *J Immunol* 160: 5936–5944.
- de Waal Malefyt R, Abrams J, Bennett B, Figdor CG, de Vries JE (1991) Interleukin 10 (IL-10) inhibits cytokine synthesis by human monocytes: an autoregulatory role of IL-10 produced by monocytes. *J Exp Med* 174: 1209–1220.
- Jungo F, Dayer JM, Modoux C, Hyka N, Burger D (2001) IFN-beta inhibits the ability of T lymphocytes to induce TNF-alpha and IL-1beta production in monocytes upon direct cell-cell contact. *Cytokine* 14: 272–282.
- Sebbag M, Parry SL, Brennan FM, Feldmann M (1997) Cytokine stimulation of T lymphocytes regulates their capacity to induce monocyte production of tumor necrosis factor-alpha, but not interleukin-10: Possible relevance to pathophysiology of rheumatoid arthritis. *Eur J Immunol* 27: 624–632.
- Focy AD, Green P, Foxwell B, Feldmann M, Brennan F (2002) Cytokine-stimulated T cells induce macrophage IL-10 production dependent on phosphatidylinositol 3-kinase and p70S6K: implications for rheumatoid arthritis. *Arthritis Res* 4: 64–70.
- de Waal Malefyt R (2000) IL-10. In: Oppenheim JJ, Feldmann M, eds. *Cytokine Reference*. London: Academic Press. pp 165–185.
- Asirvatham AJ, Magner WJ, Tomasi TB (2009) miRNA regulation of cytokine genes. *Cytokine* 45: 58–69.
- Belostotsky D (2009) Exosome complex and pervasive transcription in eukaryotic genomes. *Curr Opin Cell Biol* 21: 352–358.
- Boniface K, Bak-Jensen KS, Li Y, Blumenschein WM, McGeachy MJ, et al. (2009) Prostaglandin E2 regulates Th17 cell differentiation and function through cyclic AMP and EP2/EP4 receptor signaling. *J Exp Med* 206: 535–548.
- Dinarello CA (2007) Mutations in cryopyrin: bypassing roadblocks in the caspase 1 inflammasome for interleukin-1beta secretion and disease activity. *Arthritis Rheum* 56: 2817–2822.
- Dinarello CA (2009) Immunological and inflammatory functions of the interleukin-1 family. *Annu Rev Immunol* 27: 519–550.
- Gerosa F, Baldani-Guerra B, Lyakh LA, Batoni G, Esin S, et al. (2008) Differential regulation of interleukin 12 and interleukin 23 production in human dendritic cells. *J Exp Med* 205: 1447–1461.
- Beutler B (2007) Neo-ligands for innate immune receptors and the etiology of sterile inflammatory disease. *Immunol Rev* 220: 113–128.
- Medzhitov R (2008) Origin and physiological roles of inflammation. *Nature* 454: 428–435.
- Burger D, Rezzonico R, Li JM, Modoux C, Pierce RA, et al. (1998) Imbalance between interstitial collagenase and tissue inhibitor of metalloproteinases 1 in synoviocytes and fibroblasts upon direct contact with stimulated T lymphocytes: involvement of membrane-associated cytokines. *Arthritis Rheum* 41: 1748–1759.
- Burger D, Begue-Pastor N, Benavent S, Gruaz L, Kaufmann MT, et al. (2003) The active metabolite of leflunomide, A77 1726, inhibits the production of prostaglandin E(2), matrix metalloproteinase 1 and interleukin 6 in human fibroblast-like synoviocytes. *Rheumatology* 42: 89–96.
- Molnarfi N, Brandt KJ, Gruaz L, Dayer JM, Burger D (2008) Differential regulation of cytokine production by PI3Kdelta in human monocytes upon acute and chronic inflammatory conditions. *Mol Immunol* 45: 3419–3427.

## Acknowledgments

The authors are indebted to Christelle Barraclough (Genomics Platform) for assistance in microarray experiments and to Roswitha Rehm for skillful reading of the manuscript.

## Author Contributions

Conceived and designed the experiments: JMD DB. Performed the experiments: LG. Analyzed the data: LG CDV PD JMD DB. Contributed reagents/materials/analysis tools: CDV PD. Wrote the paper: DB.
